# Supplementary material for: Inorganic Lead-Free B-γ-CsSnI3 Perovskite Solar Cells Using Diverse Electron-Transporting Materials: A Simulation Study
Source: PubMed Central journal article supplement — ACS Omega. 2021 Sep 29;6(40):26689–98. doi: 10.1021/acsomega.1c04096 (PMC8515834; doi:10.1021/acsomega.1c04096), 2021-09-29
Supplement: ao1c04096_si_001.pdf [file ao1c04096_si_001.pdf]

Supporting Information for

**Inorganic Lead-Free B- $\gamma$ -CsSnI<sub>3</sub> Perovskite Solar Cells Using Diverse**

**Electron-Transporting Materials: A Simulation Study**

Shuo Lin<sup>a</sup>, Baoping Zhang<sup>b</sup>, Tie-Yu Lü<sup>c</sup>, Jin-Cheng Zheng<sup>c,d,\*</sup>, Huaqing Pan<sup>e</sup>, Huanting Chen<sup>a</sup>, Chuanjin Lin<sup>a</sup>, Xirong Li<sup>a</sup>, Jinrong Zhou<sup>a</sup>

<sup>a</sup> College of Physics and Information Engineering, Minnan Normal University, Zhangzhou 363000, Fujian, People's Republic of China

<sup>b</sup> Department of Electronic Engineering, Optoelectronics Engineering Research Center, College of Electronic Science and Technology (National Model Microelectronics College), Xiamen University, Xiamen, 361005, China

<sup>c</sup> Collaborative Innovation Center for Optoelectronic Semiconductors and Efficient Devices, Department of Physics, Xiamen University, Xiamen 361005, China

<sup>d</sup> Department of Physics, Xiamen University Malaysia, Sepang 43900, Selangor, Malaysia

<sup>e</sup> Department of Mechanical Engineering, Shangrao Vocational and Technical College, Shangrao 334109, Jiangxi, People's Republic of China

\*Corresponding author

E-mail address: jczheng@xmu.edu.cn (Jin-Cheng Zheng)

Table S1. Material parameters used in the simulation

| Parameters                                                                            | CsSnI <sub>3</sub> | TiO <sub>2</sub> | ZnO           | SnO <sub>2</sub> | GaN                                                               | C <sub>60</sub>                       | PCBM           | Spiro-OMeTAD          | PEDOT:PSS             |
|---------------------------------------------------------------------------------------|--------------------|------------------|---------------|------------------|-------------------------------------------------------------------|---------------------------------------|----------------|-----------------------|-----------------------|
| Band gap E <sub>g</sub> (eV)                                                          | 1.3 [1]            | 3.2 [1]          | 3.3 [13]      | 3.5 [18]         | 3.4 [21]                                                          | 1.7 [28]                              | 2 [33]         | 3.06 [36]             | 1.55 [34]             |
| Electron affinity χ (eV)                                                              | 3.62 [1]           | 4.1 [7]          | 4 [13]        | 4.5 [18]         | 4.1 [22]                                                          | 3.9 [29]                              | 3.9 [33]       | 2.05 [36]             | 3.63 [34]             |
| Dielectric constant ε                                                                 | 48.2 [2]           | 55 [8]           | 8.656 [14]    | 9 [18]           | 9.5 [23]                                                          | 4.25 [28]                             | 4 [33]         | 3 [37]                | 3 [40]                |
| Electron/hole mobility (cm <sup>2</sup> /V/s)                                         | 50/400 [3, 4]      | 0.006/0.006 [9]  | 100/25 [14]   | 100/25 [18]      | Caughy-Thomas approximation (doping concentration dependent) [24] | 1.6/1.6 [28]                          | 0.01/0.01 [33] | 2.00E-04/2.00E-4 [37] | 9.00E-03/9.00E-3 [40] |
| Effective density of states in the conduction band N <sub>C</sub> (cm <sup>-3</sup> ) | 1.57E+19 [5]       | 1.00E+21 [9]     | 2.20E+18 [15] | 2.20E+18 [18]    | 2.30E+18 [23]                                                     | 1.44E+21 [30]                         | 1.00E+21 [33]  | 1.00E+19 [38]         | 1.00E+19 [40]         |
| Effective density of states in the valence band N <sub>V</sub> (cm <sup>-3</sup> )    | 1.47E+18 [5]       | 2.00E+20 [9]     | 1.80E+19 [15] | 1.80E+19 [18]    | 4.60E+19 [23]                                                     | 1.44E+21 [30]                         | 2.00E+20 [33]  | 1.00E+19 [38]         | 1.00E+19 [40]         |
| Minority lifetime                                                                     | 6.6 ns [3]         | 15 ms [10]       | 1 ns [16]     | 2.27 ns [19]     | 0.1 ns (for electrons) [25], 6.5 ns (for holes) [26]              | 1 μs [31]                             | 1 μs [34]      | 0.1 μs [38]           | 1 μs [34]             |
| Surface recombination velocities (cm/s)                                               | 2000 [3]           | 12 [11]          | 13 [11]       | 265 [11]         | 50000 [27]                                                        | 4600 (assumed to be the same as PCBM) | 4600 [11]      | 3100 [11]             | 4900 [11]             |
| Absorption coefficient (1/cm <sup>-1</sup> )                                          | [6]                | [12]             | [17]          | [20]             | [21]                                                              | [32]                                  | [35]           | [39]                  | [41]                  |
| Initial donor concentration (cm <sup>-3</sup> )                                       | 0                  | 5E+19            | 1E+18         | 1E+18            | 1E+18                                                             | 5E+17                                 | 5E+17          | 0                     | 0                     |
| Optimal donor concentration (cm <sup>-3</sup> )                                       | 0                  | 1E+21            | 1E+18         | 1E+18            | 1E+18                                                             | 5E+18                                 | 5E+18          | 0                     | 0                     |
| Initial acceptor concentration (cm <sup>-3</sup> )                                    | 5E+17 [3]          | 0                | 0             | 0                | 0                                                                 | 0                                     | 0              | 3E+17                 | 1E+20                 |
| Initial thickness (nm)                                                                | variable           | 25               | 25            | 25               | 25                                                                | 30                                    | 30             | 400                   | 40                    |
| Optimal thickness (nm)                                                                | 100~200            |                  |               |                  |                                                                   |                                       |                |                       |                       |

Figure S1. Energy band alignment of all contact materials and CsSnI<sub>3</sub> adopted in this study

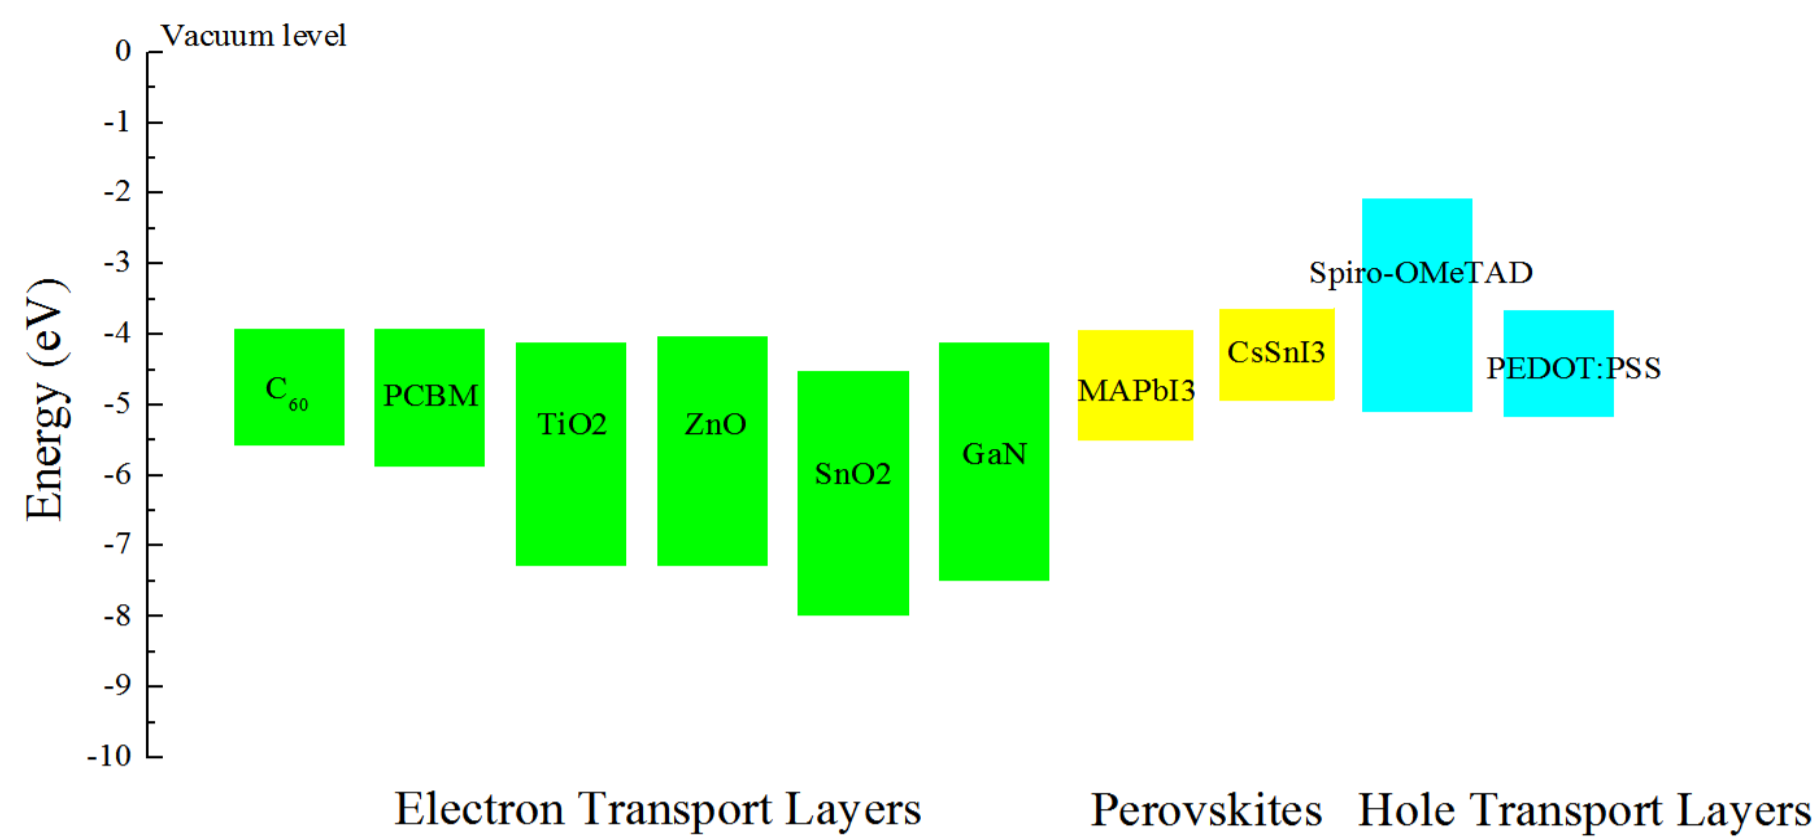

## References

- [1] Chung, I.; Lee, B.; He, J.; Chang, R. P. H.; Kanatzidis, M. G. All-solid-state dye-sensitized solar cells with high efficiency. *Nature* **2012**, 485, 486-489.
- [2] Kumar, M. H.; Dharani, S.; Leong, W. L.; Boix, P. P.; Prabhakar, R. R.; Baikie, T.; Shi, C.; Ding, H.; Ramesh, R.; Asta, M.; Graetzel M.; Mhaisalkar, S. G.; Mathews, N. Lead-free halide perovskite solar cells with high photocurrents realized through vacancy modulation. *Adv. Mater.* **2014**, 26, 7122-7127.
- [3] Wu, B.; Zhou, Y.; Xing, G.; Xu, Q.; Garces, H. F.; Solanki, A.; Goh, T. W.; Padture, N. P.; Sum, T. C.. Long minority-carrier diffusion length and low surface-recombination velocity in inorganic lead-free CsSnI<sub>3</sub> perovskite crystal for solar cells. *Adv. Funct. Mater.* **2017**, 27, 1604818.
- [4] Chung, I.; Song, J. H.; Im, J.; Androulakis, J.; Malliakas, C. D.; Li, H.; Freeman, A. J.; Kenney, J. T.; Kanatzidis, M. G. CsSnI<sub>3</sub>: semiconductor or metal? High electrical conductivity and strong near-infrared photoluminescence from a single material. High hole mobility and phase-transitions. *J. Am. Chem. Soc.* **2012**, 134, 8579-8587.
- [5] Shum, K.; Chen, Z.; Qureshi, J.; Yu, C.; Wang, J. J.; Pfenninger, W.; Vockic, N.; Midgley, J.; Kenney, J. T. Synthesis and characterization of CsSnI<sub>3</sub> thin films. *Appl. Phys. Lett.* **2010**, 96, 221903.
- [6] Qiu, X.; Cao, B.; Yuan, S.; Chen, X.; Qiu, Z.; Jiang, Y.; Ye, Q.; Wang, H.; Zeng, H.; Liu, J.; Kanatzidis, M. G. From unstable CsSnI<sub>3</sub> to air-stable Cs<sub>2</sub>SnI<sub>6</sub>: A lead-free perovskite solar cell light absorber with bandgap of 1.48 eV and high absorption coefficient. *Sol. Energy Mater. Sol. Cells* **2017**, 159, 227-234.
- [7] Jung, H. S.; Park, N. G. Perovskite solar cells: from materials to devices. *Small* **2015**, 11, 10-25.
- [8] van de Krol, R.; Goossens, A.; Schoonman, J. Mott-Schottky analysis of nanometer-scale thin-film anatase TiO<sub>2</sub>. *J. Electrochem. Soc.* **1997**, 144, 1723-1727.
- [9] Adhikari, K. R.; Gurung, S.; Bhattarai, B. K.; Soucase, B. M. Comparative study on MAPbI<sub>3</sub> based solar cells using different electron transporting materials. *Phys. Status Solidi C* **2016**, 13, 13-17.
- [10] Mitroi, M. R.; Fara, L. Optimization of black dye-sensitized solar cells by numerical simulation. *J. Renewable Sustainable Energy* **2013**, 5, 041818.
- [11] Wang, J.; Fu, W.; Jariwala, S.; Sinha, I.; Jen, AK-Y.; Ginger, D. S. Reducing surface recombination velocities at the electrical contacts will improve perovskite photovoltaics. *ACS Energy Lett.* **2019**, 4, 222-227.
- [12] Naik, V. M.; Haddad, D.; Naik, R.; Benci, J.; Auner, G. W. Optical properties of anatase, rutile and amorphous phases of TiO<sub>2</sub> thin films grown at room temperature by RF magnetron sputtering. *Mat. Res. Soc. Symp. Proc.* **2003**, 755, DD11.12.1. Materials Research Society.
- [13] Bansal, S.; Aryal, P. Evaluation of new materials for electron and hole transport layers in perovskite-based solar cells through SCAPS-1D simulations. *IEEE 44th photovoltaic specialists conference* **2017**. IEEE.
- [14] Pearton, S. J.; Norton, D. P.; Ip, K.; Heo, Y. W.; Steiner, T. Recent progress in processing and properties of ZnO. *Superlattice Microst.* **2003**, 34, 3-32.
- [15] Wanda, M. D.; Ouédraogo, S.; Tchhoffo, F.; Zougmore, F.; Ndjaka, J. M. B. Numerical investigations and analysis of Cu<sub>2</sub>ZnSnS<sub>4</sub> based solar cells by SCAPS-1D. *Int. J. photoenergy* **2016**, 2152018.
- [16] Ali, A.; Hussain, B.; Ebong, A. Computer modeling of n-ZnO/p-Si single heterojunction bifacial solar cell. *IEEE 43rd Photovoltaic Specialists Conference* **2016**. IEEE.
- [17] SCAPS-1D software data file.
- [18] Cao, Y.; Zhu, X. Y.; Chen, H. B.; Wang, C. G.; Zhang, X. T.; Hou, B. D.; et al. Simulation and optimal design of antimony selenide thin film solar cells. *Acta. Phys. Sin.* **2018**, 67, 247301.
- [19] Lee, P. M.; Liao, C. H.; Lin, C. H.; Liu, C. Y. Photocurrent generation in SnO<sub>2</sub> thin film by surface charged chemisorption O ions. *Appl. Surf. Sci.* **2018**, 442, 398-402.
- [20] Khan, A. F.; Mehmood, M.; Aslam, M.; Ashraf, M. Characteristics of electron beam evaporated nanocrystalline SnO<sub>2</sub> thin films annealed in air. *Appl. Surf. Sci.* **2010**, 256, 2252-2258.
- [21] Muth, J. F.; Lee, J. H.; Shmagin, I. K.; Kolbas, R. M.; Casey, H. C., Jr.; Keller, B. P.; Mishra, U. K.; DenBaars, S. P. Absorption coefficient, energy gap, exciton binding energy, and recombination lifetime of GaN obtained from transmission measurements. *Appl. Phys. Lett.* **1997**, 71, 2572-2524.

- [22] Marti, A.; Tablero, C.; Antolin, E.; Luque, A.; Campion, R. P.; Novikov, S. V.; Campion, R. P.; Novikov, S. V.; Foxon, C. T. *Sol. Energy Mater. Sol. Cells* **2009**, *93*, 641-644.
- [23] Lin, S.; Zeng S. W.; Cai X. M.; Zhang J. Y.; Wu S. X.; Sun L.; Zhang, B. P. Simulation of doping levels and deep levels in InGaN-based single-junction solar cell. *J. Mater. Sci.* **2012**, *47*, 4595-4603.
- [24] Mnatsakanov, T. T.; Levinshtein, M. E.; Pomortseva, L. I.; Yurkov, S. N.; Simin, G. S.; Khan, M. A. Carrier mobility model for GaN. *Solid-State Electron.* **2003**, *47*, 111-115.
- [25] Bandic, Z. Z.; Bridger, P. M.; Piquette, E. C.; McGill, T. C. Electron diffusion length and lifetime in p-type GaN. *Appl. Phys. Lett.* **1998**, *73*, 3276-3278.
- [26] Bandic, Z. Z.; Bridger, P. M.; Piquette, E. C.; McGill, T. C. Minority carrier diffusion length and lifetime in GaN. *Appl. Phys. Lett.* **1998**, *72*, 3166-3168.
- [27] Aleksiejunas, R.; Sudzius, M.; Malinauskas, T.; Vaitkus, J.; Jarasiunas, K.; Sakai, S. *Appl. Phys. Lett.* **2003**, *83*, 1157-1159.
- [28] Golubev, T.; Liu, D.; Lunt, R.; Duxbury, P. Understanding the impact of C<sub>60</sub> at the interface of perovskite solar cells via drift-diffusion modeling. *AIP Adv.* **2019**, *9*, 035026.
- [29] Liang, P. W.; Chueh, C. C.; Williams, S. T.; Jen, A. K. -Y. Roles of fullerene-based interlayers in enhancing the performance of organometal perovskite thin-film solar cells. *Adv. Energy Mater.* **2015**, *5*, 1402321.
- [30] Dixit, H.; Punetha, D.; Pandey, S. K. Improvement in performance of lead free inverted perovskite solar cell by optimization of solar parameters. *Optik* **2019**, *179*, 969-976.
- [31] Burlingame, Q.; Tong, X.; Hankett, J.; Sloatsky, M.; Chen, Z.; Forrest, S. R. Photochemical origins of burn-in degradation in small molecular weight organic photovoltaic cells. *Energy Environ. Sci.* **2015**, *8*, 1005-1010.
- [32] Monestier, F.; Simon, J. J.; Torchio, P.; Escoubas, L.; Ratier, B.; Hojeij, W.; Lucas, B.; Moliton, A.; Cathelinaud, M.; Defranoux, C.; Flory, F. Optical modeling of organic solar cells based on CuPc and C60. *Appl. Optics* **2008**, *47*, C251-6.
- [33] Zhao, P.; Liu, Z.; Lin, Z.; Chen, D.; Su, J.; Zhang, C.; Zhang, J.; Chang, J.; Hao, Y. Device simulation of inverted CH<sub>3</sub>NH<sub>3</sub>PbI<sub>3-x</sub>Cl<sub>x</sub> perovskite solar cells based on PCBM electron transport layer and NiO hole transport layer. *Sol. Energy* **2018**, *169*, 11-18.
- [34] Nie, W.; Tsai, H.; Asadpour, R.; Blancon, J. C.; Neukirch, A. J.; Gupta, G.; Crochet, J. J.; Chhowalla, M.; Tretiak, S.; Alam, M. A.; Wang, H.-L.; Mohite, A. D. High-efficiency solution-processed perovskite solar cells with millimeter-scale grains. *Science* **2015**, *347*, 522.
- [35] Pospisil, J.; Schmiedova, V.; Zmeskal, O.; Cerny, J. Study of optical and electrical properties of organic thin films for photovoltaic applications. *Mater. Sci.* **2015**, *21*, 333-338.
- [36] Hossain, M. I.; Alharbi, F. H.; Tabet, N. Copper oxide as inorganic hole transport material for lead halide perovskite based solar cells. *Sol. Energy* **2015**, *120*, 370-380.
- [37] Minemoto, T.; Murata, M. Device modeling of perovskite solar cells based on structural similarity with thin film inorganic semiconductor solar cells. *J. Appl. Phys.* **2014**, *116*, 054505.
- [38] An, Y.; Shang, A.; Cao, G.; Wu, S.; Ma, D.; Li, X. Perovskite Solar Cells: Optoelectronic Simulation and Optimization. *Sol. RRL* **2018**, *2*, 1800126.
- [39] Filipič, M.; Löper, P.; Niesen, B.; Wolf, S. D.; Krč, J.; Ballif, C.; Topič, M. *Opt. Express* **2015**, *23*, A263-78.
- [40] Olyaeefar, B.; Ahmadi-Kandjani, S.; Asgari, A. Classical modelling of grain size and boundary effects in polycrystalline perovskite solar cells. *Sol. Energy Mater. Sol. Cells* **2018**, *180*, 76-82.
- [41] [http://www.ampsmodeling.org/materials/PEDOT\\_absorption\\_coefficients.htm](http://www.ampsmodeling.org/materials/PEDOT_absorption_coefficients.htm). Accessed Sep 2010.
